# Supplementary material for: Historical drought patterns over Canada and their relation to teleconnections
Source: Copernicus journal article supplement (doi:10.5194/hess-2018-122), 2018-03-14
Supplement: Supplementary file 1 [file hess-2018-122-supplement.pdf]

# Historical drought patterns over Canada and their relation to teleconnections

Zilefac Elvis Asong<sup>1</sup>, Howard Simon Wheeler<sup>1</sup>, Barrie Bonsal<sup>2</sup>, Saman Razavi<sup>1</sup>, Sopan Kurkute<sup>1</sup>

<sup>1</sup>*Global Institute for Water Security and School of Environment and Sustainability, University of Saskatchewan, 11 Innovation Blvd, Saskatoon, SK, Canada S7N 3H5*

<sup>2</sup>*Environment and Climate Change Canada, 11 Innovation Blvd, Saskatoon, SK, Canada S7N 3H5*

**\*Corresponding author:**

Phone: +1 306 491 9565

Email: [elvis.asong@usask.ca](mailto:elvis.asong@usask.ca)

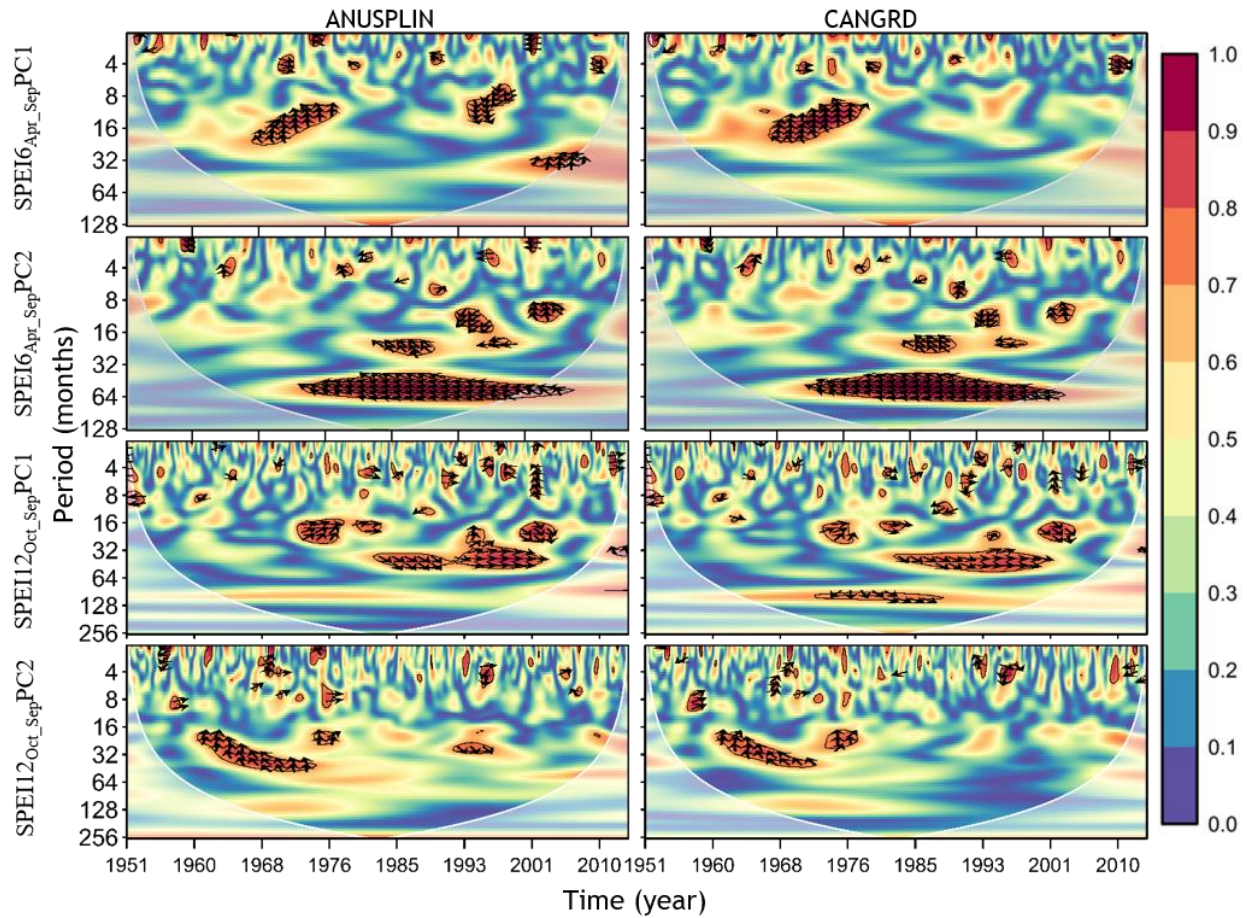

25

26 **Figure S1:** Squared wavelet coherence between the AMO and the temporal patterns of drought  
 27 (SPEI6<sub>Apr\_Sept</sub> and SPEI12<sub>Oct\_Sept</sub>). Phase arrows pointing right indicate signals are in phase, whereas a left-  
 28 pointing arrows indicate an antiphase relationship. Arrows deviating from the horizontal are indicative of  
 29 lead-lag relationships between the two signals. The black contour designates the 95% confidence level  
 30 against red noise, and the cone of the influence (COI) where edge effects might distort the picture is shown  
 31 as a lighter grey shade.

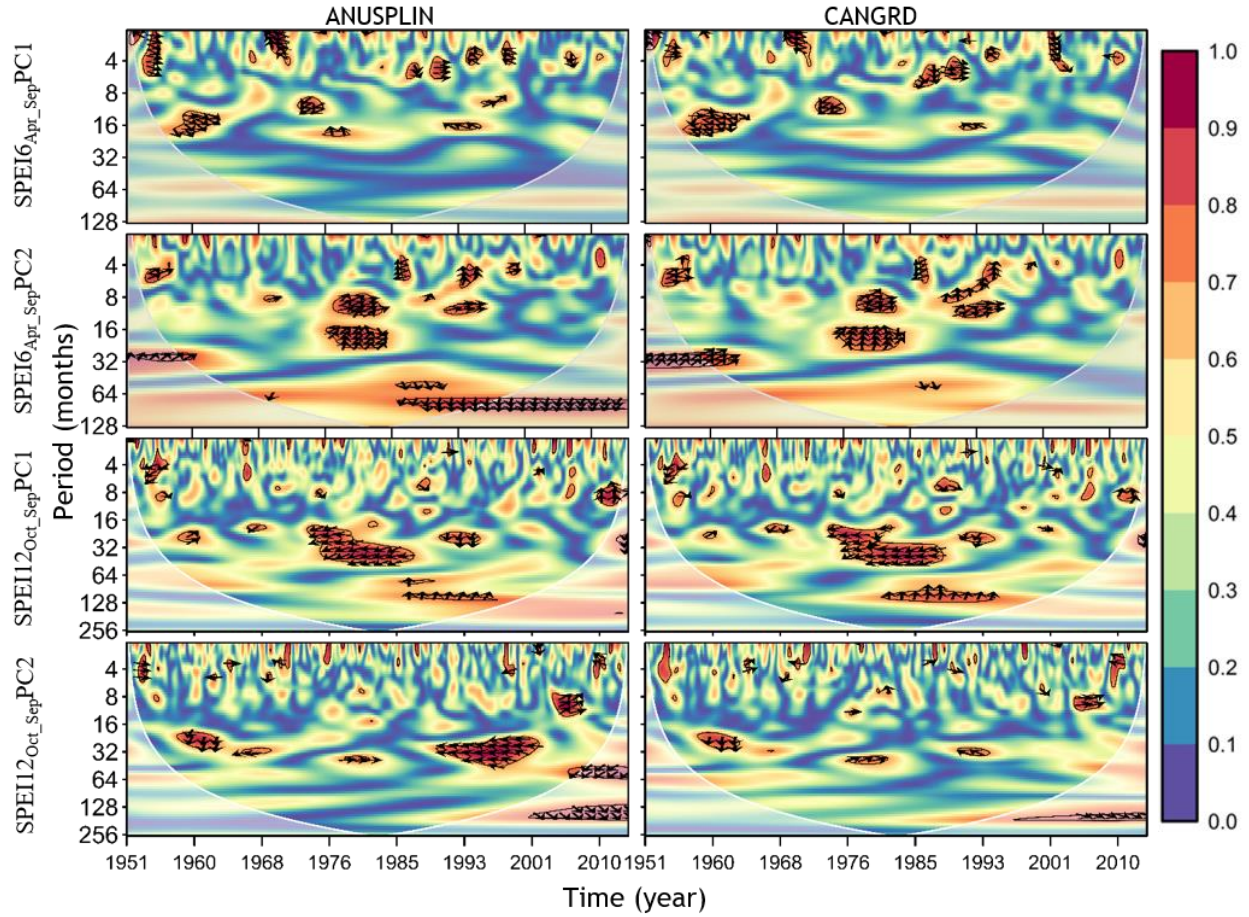

**Figure S2:** Squared wavelet coherence between the AO and the temporal patterns of drought (SPEI6<sub>Apr\_Sep</sub> and SPEI12<sub>Oct\_Sept</sub>). Phase arrows pointing right indicate signals are in phase, whereas a left-pointing arrows indicate an antiphase relationship. Arrows deviating from the horizontal are indicative of lead-lag relationships between the two signals. The black contour designates the 95% confidence level against red noise, and the cone of the influence (COI) where edge effects might distort the picture is shown as a lighter grey shade.



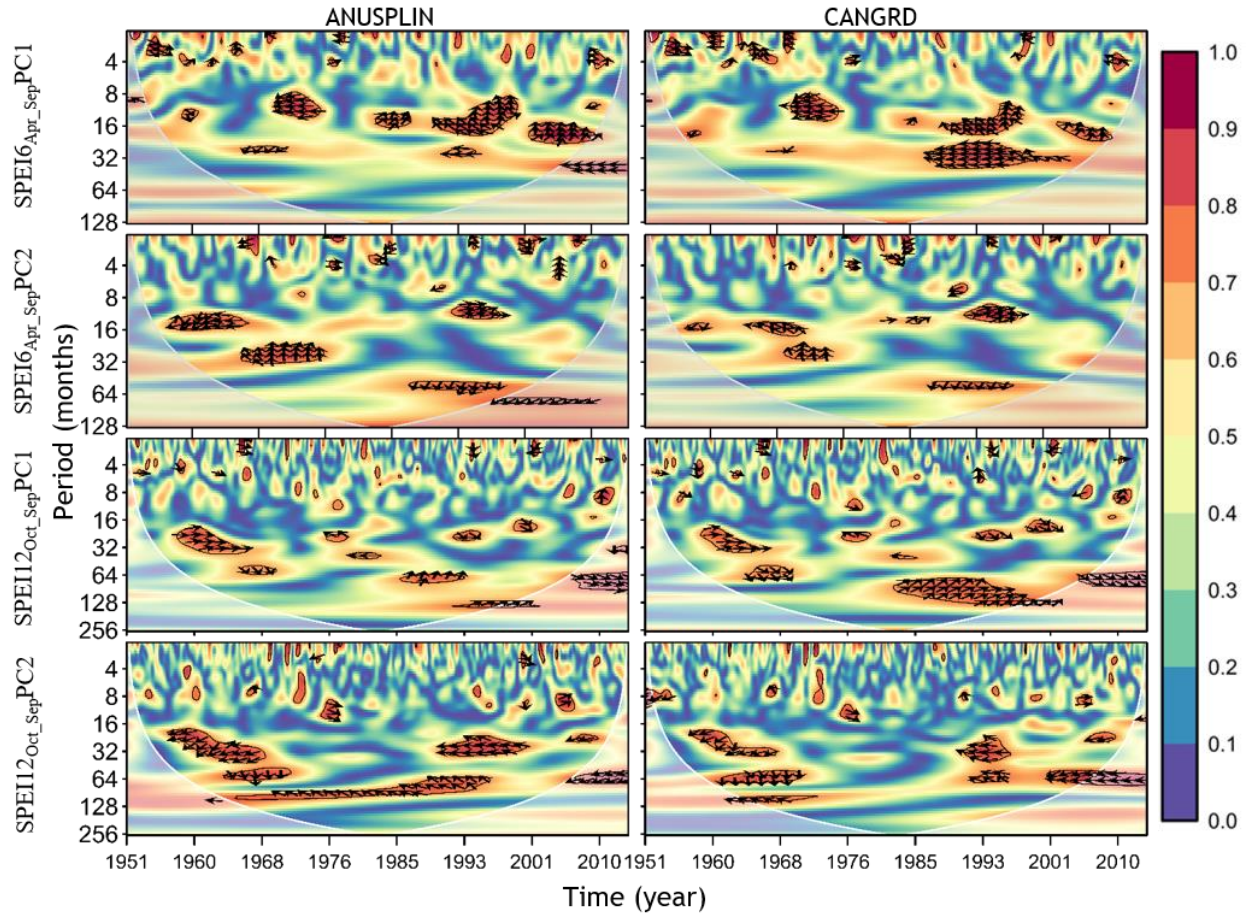

**Figure S3:** Squared wavelet coherence between the NAO and the temporal patterns of drought (SPEI6<sub>Apr\_Sep</sub> and SPEI12<sub>Oct\_Sept</sub>). Phase arrows pointing right indicate signals are in phase, whereas a left-pointing arrows indicate an antiphase relationship. Arrows deviating from the horizontal are indicative of lead-lag relationships between the two signals. The black contour designates the 95% confidence level against red noise, and the cone of the influence (COI) where edge effects might distort the picture is shown as a lighter grey shade.
