# Supplementary material for: Historical drought patterns over Canada and their relation to teleconnections
Source: Copernicus journal article supplement (doi:10.5194/hess-2018-122), 2018-03-14
Supplement: Supplementary file [file hess-2018-122-AC3-supplement.pdf]

Global Institute for Water Security  
University of Saskatchewan  
11 Innovation Boulevard  
Saskatoon, SK S7N 3H5  
Canada

30-04-2018

**J. Hanesiak**  
Editor, HESS

Dear Dr. Hanesiak:

Thank you for your letter dated 16 April 2018. We were pleased to know that our manuscript was rated as potentially acceptable for publication in *HESS*, subject to adequate revision and response to comments from the editor and reviewers.

As you can notice, we have revised the manuscript following comments made by the editor and reviewers. We also have provided point-by-point response to all comments following the guidelines which you provided in the decision letter. Overall, the revised looks more presentable and easy to follow. We would like to take this opportunity to express our sincere thanks to the editor and reviewers who identified areas of our manuscript that needed improvements.

We hope that the revised manuscript is acceptable for publication in *HESS*.

Thank you for your consideration and we look forward to hearing from you.

Sincerely,

Elvis Asong  
([elvis.asong@usask.ca](mailto:elvis.asong@usask.ca))
